# Supplementary material for: Improved risk scoring systems for colorectal cancer screening in Shanghai, China
Source: PubMed Central journal article supplement (PMC9089226; doi:10.1002/cam4.4576), 2022-03-11
Supplement: CAM4-11-1972-s001.pdf [file CAM4-11-1972-s001.pdf]

## Supplementary Materials

**Supplementary Table 1.** Multivariable logistic regression analysis of risk factors for colorectal cancer (n=807,201)

| Variable                      | Without FIT |       |                      |                      | Incorporating 1-sample FIT |       |                         |                      | Incorporating 2-sample FIT |       |                         |                      |
|-------------------------------|-------------|-------|----------------------|----------------------|----------------------------|-------|-------------------------|----------------------|----------------------------|-------|-------------------------|----------------------|
|                               | $\beta$     | SE    | OR (95%CI)           | <i>p</i> value / FDR | $\beta$                    | SE    | OR (95%CI)              | <i>p</i> value / FDR | $\beta$                    | SE    | OR (95%CI)              | <i>p</i> value / FDR |
| Age at screening (years)      | 0.061       | 0.003 | 1.062 (1.056, 1.069) | < 0.001              | 0.056                      | 0.003 | 1.058 (1.051, 1.064)    | < 0.001              | 0.055                      | 0.003 | 1.056 (1.049, 1.063)    | < 0.001              |
| Sex (male vs female)          | 0.456       | 0.038 | 1.578 (1.464, 1.701) | < 0.001              | 0.386                      | 0.038 | 1.471 (1.364, 1.586)    | < 0.001              | 0.382                      | 0.038 | 1.465 (1.359, 1.580)    | < 0.001              |
| Chronic diarrhea              | 0.392       | 0.068 | 1.480 (1.295, 1.692) | < 0.001              | 0.300                      | 0.069 | 1.350 (1.180, 1.544)    | < 0.001              | 0.277                      | 0.069 | 1.318 (1.153, 1.508)    | < 0.001              |
| Mucus or bloody stool         | 0.870       | 0.083 | 2.386 (2.029, 2.806) | < 0.001              | 0.683                      | 0.083 | 1.980 (1.682, 2.331)    | < 0.001              | 0.646                      | 0.083 | 1.907 (1.620, 2.245)    | < 0.001              |
| Diagnosis of any cancer       | 0.402       | 0.104 | 1.495 (1.219, 1.834) | < 0.001              | 0.377                      | 0.105 | 1.458 (1.187, 1.792)    | < 0.001              | 0.367                      | 0.105 | 1.444 (1.175, 1.774)    | < 0.001              |
| CRC in first-degree relatives | 0.631       | 0.081 | 1.880 (1.604, 2.203) | < 0.001              | 0.554                      | 0.082 | 1.740 (1.483, 2.041)    | < 0.001              | 0.531                      | 0.081 | 1.701 (1.450, 1.995)    | < 0.001              |
| FIT (positive vs negative)    | -           | -     | -                    | -                    | 2.395                      | 0.038 | 10.972 (10.181, 11.825) | < 0.001              | 2.465                      | 0.040 | 11.764 (10.880, 12.719) | < 0.001              |

CRC, colorectal cancer; FIT, faecal immunochemical test; OR, odds ratio; FDR, false discovery rate (corrected *p* value for multiple comparisons).

**Supplementary Table 2.** Weights from the input variables to the hidden layer neurons, and from the hidden layer neurons to the outcome variable in the artificial neural network model incorporating risk factors only

| From                        | To | Weight   | Abs (weight) | Sum     | Abs (weight)/Sum | $v_j * u_{jk}$ | $C_k$ |
|-----------------------------|----|----------|--------------|---------|------------------|----------------|-------|
| Male                        | H1 | -0.27174 | 0.27174      | 0.97661 | 0.27825          | 0.01161        | 0.170 |
| Diagnosis of any cancer     | H1 | -0.26207 | 0.26207      |         | 0.26834          | 0.01120        | 0.133 |
| Age at screening            | H1 | -0.15460 | 0.15460      |         | 0.15830          | 0.00661        | 0.205 |
| Chronic diarrhea            | H1 | 0.12497  | 0.12497      |         | 0.12796          | 0.00534        | 0.104 |
| Mucus or bloody stool       | H1 | 0.08865  | 0.08865      |         | 0.09077          | 0.00379        | 0.117 |
| CRC in 1st degree relatives | H1 | 0.07459  | 0.07459      |         | 0.07637          | 0.00319        | 0.271 |
| Age at screening            | H2 | 0.19650  | 0.19650      | 0.63782 | 0.30807          | 0.00920        |       |
| CRC in 1st degree relatives | H2 | 0.16219  | 0.16219      |         | 0.25428          | 0.00759        |       |
| Male                        | H2 | 0.13984  | 0.13984      |         | 0.21924          | 0.00655        |       |
| Chronic diarrhea            | H2 | -0.10297 | 0.10297      |         | 0.16144          | 0.00482        |       |
| Diagnosis of any cancer     | H2 | 0.03475  | 0.03475      |         | 0.05449          | 0.00163        |       |
| Mucus or bloody stool       | H2 | 0.00158  | 0.00158      |         | 0.00248          | 0.00007        |       |
| Mucus or bloody stool       | H3 | 2.01889  | 2.01889      | 8.35712 | 0.24158          | 0.03016        |       |
| CRC in 1st degree relatives | H3 | 1.94547  | 1.94547      |         | 0.23279          | 0.02907        |       |
| Male                        | H3 | -1.55340 | 1.55340      |         | 0.18588          | 0.02321        |       |
| Age at screening            | H3 | -1.53159 | 1.53159      |         | 0.18327          | 0.02288        |       |
| Chronic diarrhea            | H3 | -0.67775 | 0.67775      |         | 0.08110          | 0.01013        |       |
| Diagnosis of any cancer     | H3 | 0.63004  | 0.63004      |         | 0.07539          | 0.00941        |       |
| Age at screening            | H4 | 1.93165  | 1.93165      | 5.05783 | 0.38191          | 0.03961        |       |
| CRC in 1st degree relatives | H4 | -1.23122 | 1.23122      |         | 0.24343          | 0.02525        |       |
| Diagnosis of any cancer     | H4 | 0.97622  | 0.97622      |         | 0.19301          | 0.02002        |       |
| Chronic diarrhea            | H4 | 0.73138  | 0.73138      |         | 0.14460          | 0.01500        |       |
| Male                        | H4 | 0.18253  | 0.18253      |         | 0.03609          | 0.00374        |       |
| Mucus or bloody stool       | H4 | -0.00483 | 0.00483      |         | 0.00095          | 0.00010        |       |
| CRC in 1st degree relatives | H5 | 2.68647  | 2.68647      | 5.93873 | 0.45236          | 0.09853        |       |
| Age at screening            | H5 | 1.14948  | 1.14948      |         | 0.19356          | 0.04216        |       |
| Mucus or bloody stool       | H5 | 1.05097  | 1.05097      |         | 0.17697          | 0.03854        |       |
| Diagnosis of any cancer     | H5 | 0.49258  | 0.49258      |         | 0.08294          | 0.01807        |       |
| Male                        | H5 | 0.47707  | 0.47707      |         | 0.08033          | 0.01750        |       |
| Chronic diarrhea            | H5 | 0.08217  | 0.08217      |         | 0.01384          | 0.00301        |       |
| Male                        | H6 | -2.09256 | 2.09256      | 6.76293 | 0.30942          | 0.04190        |       |
| CRC in 1st degree relatives | H6 | -2.00520 | 2.00520      |         | 0.29650          | 0.04015        |       |
| Chronic diarrhea            | H6 | -1.01957 | 1.01957      |         | 0.15076          | 0.02041        |       |
| Age at screening            | H6 | -0.59480 | 0.59480      |         | 0.08795          | 0.01191        |       |
| Diagnosis of any cancer     | H6 | 0.58950  | 0.58950      |         | 0.08717          | 0.01180        |       |
| Mucus or bloody stool       | H6 | 0.46129  | 0.46129      |         | 0.06821          | 0.00924        |       |
| Age at screening            | H7 | 2.46842  | 2.46842      | 8.21875 | 0.30034          | 0.03497        |       |
| Male                        | H7 | 1.82274  | 1.82274      |         | 0.22178          | 0.02582        |       |
| Mucus or bloody stool       | H7 | -1.18750 | 1.18750      |         | 0.14449          | 0.01682        |       |
| Chronic diarrhea            | H7 | 0.93882  | 0.93882      |         | 0.11423          | 0.01330        |       |
| Diagnosis of any cancer     | H7 | 0.92094  | 0.92094      |         | 0.11205          | 0.01305        |       |
| CRC in 1st degree relatives | H7 | 0.88033  | 0.88033      |         | 0.10711          | 0.01247        |       |
| Diagnosis of any cancer     | H8 | 0.65124  | 0.65124      | 1.62567 | 0.40060          | 0.02459        |       |
| Chronic diarrhea            | H8 | -0.42257 | 0.42257      |         | 0.25993          | 0.01596        |       |
| CRC in 1st degree relatives | H8 | 0.20312  | 0.20312      |         | 0.12494          | 0.00767        |       |
| Mucus or bloody stool       | H8 | 0.15098  | 0.15098      |         | 0.09287          | 0.00570        |       |

|                             |     |          |         |         |         |         |
|-----------------------------|-----|----------|---------|---------|---------|---------|
| Age at screening            | H8  | 0.10092  | 0.10092 |         | 0.06208 | 0.00381 |
| Male                        | H8  | 0.09685  | 0.09685 |         | 0.05958 | 0.00366 |
| Age at screening            | H9  | 0.92719  | 0.92719 | 2.87844 | 0.32212 | 0.00744 |
| Male                        | H9  | 0.51864  | 0.51864 |         | 0.18018 | 0.00416 |
| Chronic diarrhea            | H9  | -0.43434 | 0.43434 |         | 0.15089 | 0.00348 |
| CRC in 1st degree relatives | H9  | -0.40795 | 0.40795 |         | 0.14173 | 0.00327 |
| Diagnosis of any cancer     | H9  | 0.38351  | 0.38351 |         | 0.13324 | 0.00308 |
| Mucus or bloody stool       | H9  | 0.20681  | 0.20681 |         | 0.07185 | 0.00166 |
| Age at screening            | H10 | -1.01713 | 1.01713 | 4.12186 | 0.24677 | 0.01721 |
| CRC in 1st degree relatives | H10 | 0.92324  | 0.92324 |         | 0.22399 | 0.01562 |
| Male                        | H10 | -0.82160 | 0.82160 |         | 0.19933 | 0.01390 |
| Diagnosis of any cancer     | H10 | -0.70272 | 0.70272 |         | 0.17049 | 0.01189 |
| Chronic diarrhea            | H10 | 0.64789  | 0.64789 |         | 0.15718 | 0.01096 |
| Mucus or bloody stool       | H10 | -0.00927 | 0.00927 |         | 0.00225 | 0.00016 |
| CRC in 1st degree relatives | H11 | 0.55002  | 0.55002 | 1.45946 | 0.37686 | 0.02864 |
| Male                        | H11 | 0.35183  | 0.35183 |         | 0.24107 | 0.01832 |
| Mucus or bloody stool       | H11 | 0.19413  | 0.19413 |         | 0.13302 | 0.01011 |
| Age at screening            | H11 | 0.18169  | 0.18169 |         | 0.12449 | 0.00946 |
| Diagnosis of any cancer     | H11 | -0.16039 | 0.16039 |         | 0.10990 | 0.00835 |
| Chronic diarrhea            | H11 | 0.02140  | 0.02140 |         | 0.01467 | 0.00111 |
| H5                          | CRC | 1.75004  | 1.75004 | 8.03495 | 0.21780 |         |
| H6                          | CRC | -1.08799 | 1.08799 |         | 0.13541 |         |
| H3                          | CRC | 1.00322  | 1.00322 |         | 0.12486 |         |
| H7                          | CRC | -0.93545 | 0.93545 |         | 0.11642 |         |
| H4                          | CRC | 0.83334  | 0.83334 |         | 0.10371 |         |
| H11                         | CRC | -0.61066 | 0.61066 |         | 0.07600 |         |
| H10                         | CRC | -0.56034 | 0.56034 |         | 0.06974 |         |
| H8                          | CRC | -0.49327 | 0.49327 |         | 0.06139 |         |
| H1                          | CRC | 0.33528  | 0.33528 |         | 0.04173 |         |
| H2                          | CRC | -0.23987 | 0.23987 |         | 0.02985 |         |
| H9                          | CRC | 0.18549  | 0.18549 |         | 0.02308 |         |

CRC, colorectal cancer. Note:  $u_{jk}$  is calculated as the absolute value of weight between predictor variable  $k$  and hidden unit  $j$  divided by total absolute values of weights pointing to hidden unit  $j$ ;  $v_j$  is calculated as the absolute value of weight between hidden unit  $j$  and the outcome divided by total absolute values of weights pointing to the outcome;  $C_k$  represents the contribution of predictor variable  $k$  on the outcome; the sum of contributions of all predictor variables is 100%.

**Supplementary Table 3.** Weights from the input variables to the hidden layer neurons, and from the hidden layer neurons to the outcome variable in the artificial neural network model incorporating risk factors and 1-sample FIT results

| From                        | To | Weight   | Abs (weight) | Sum     | Abs (weight)/Sum | $v_j * u_{jk}$ | $C_k$ |
|-----------------------------|----|----------|--------------|---------|------------------|----------------|-------|
| Age at screening            | H1 | 0.29252  | 0.29252      | 1.42158 | 0.20577          | 0.00669        | 0.099 |
| Diagnosis of any cancer     | H1 | 0.10606  | 0.10606      |         | 0.07461          | 0.00243        | 0.102 |
| Positive FIT (1-sample)     | H1 | 0.26350  | 0.26350      |         | 0.18536          | 0.00603        | 0.280 |
| Chronic diarrhea            | H1 | -0.05941 | 0.05941      |         | 0.04179          | 0.00136        | 0.105 |
| Male                        | H1 | -0.13967 | 0.13967      |         | 0.09825          | 0.00319        | 0.107 |
| Mucus or bloody stool       | H1 | 0.17779  | 0.17779      |         | 0.12507          | 0.00407        | 0.123 |
| CRC in 1st degree relatives | H1 | 0.38261  | 0.38261      |         | 0.26915          | 0.00875        | 0.184 |
| Age at screening            | H2 | 0.23872  | 0.23872      | 2.85752 | 0.08354          | 0.00936        |       |
| Diagnosis of any cancer     | H2 | 0.02195  | 0.02195      |         | 0.00768          | 0.00086        |       |
| Positive FIT (1-sample)     | H2 | -0.38582 | 0.38582      |         | 0.13502          | 0.01512        |       |
| Chronic diarrhea            | H2 | -0.57296 | 0.57296      |         | 0.20051          | 0.02246        |       |
| Male                        | H2 | -0.19409 | 0.19409      |         | 0.06792          | 0.00761        |       |
| Mucus or bloody stool       | H2 | -0.72617 | 0.72617      |         | 0.25413          | 0.02846        |       |
| CRC in 1st degree relatives | H2 | 0.71780  | 0.71780      |         | 0.25120          | 0.02813        |       |
| Age at screening            | H3 | 0.07186  | 0.07186      | 1.94706 | 0.03691          | 0.00236        |       |
| Diagnosis of any cancer     | H3 | -0.18630 | 0.18630      |         | 0.09568          | 0.00613        |       |
| Positive FIT (1-sample)     | H3 | -0.66061 | 0.66061      |         | 0.33929          | 0.02174        |       |
| Chronic diarrhea            | H3 | -0.25302 | 0.25302      |         | 0.12995          | 0.00833        |       |
| Male                        | H3 | 0.31689  | 0.31689      |         | 0.16275          | 0.01043        |       |
| Mucus or bloody stool       | H3 | -0.00934 | 0.00934      |         | 0.00480          | 0.00031        |       |
| CRC in 1st degree relatives | H3 | -0.44903 | 0.44903      |         | 0.23062          | 0.01478        |       |
| Age at screening            | H4 | 0.49424  | 0.49424      | 2.58054 | 0.19153          | 0.01832        |       |
| Diagnosis of any cancer     | H4 | 0.02298  | 0.02298      |         | 0.00891          | 0.00085        |       |
| Positive FIT (1-sample)     | H4 | 0.84717  | 0.84717      |         | 0.32829          | 0.03140        |       |
| Chronic diarrhea            | H4 | -0.10517 | 0.10517      |         | 0.04075          | 0.00390        |       |
| Male                        | H4 | 0.33989  | 0.33989      |         | 0.13171          | 0.01260        |       |
| Mucus or bloody stool       | H4 | -0.01418 | 0.01418      |         | 0.00549          | 0.00053        |       |
| CRC in 1st degree relatives | H4 | -0.75691 | 0.75691      |         | 0.29331          | 0.02806        |       |
| Age at screening            | H5 | 0.29125  | 0.29125      | 2.23394 | 0.13037          | 0.01250        |       |
| Diagnosis of any cancer     | H5 | -0.27995 | 0.27995      |         | 0.12532          | 0.01202        |       |
| Positive FIT (1-sample)     | H5 | -0.68130 | 0.68130      |         | 0.30498          | 0.02924        |       |
| Chronic diarrhea            | H5 | -0.26016 | 0.26016      |         | 0.11646          | 0.01117        |       |
| Male                        | H5 | 0.58311  | 0.58311      |         | 0.26102          | 0.02503        |       |
| Mucus or bloody stool       | H5 | 0.06495  | 0.06495      |         | 0.02907          | 0.00279        |       |
| CRC in 1st degree relatives | H5 | -0.07323 | 0.07323      |         | 0.03278          | 0.00314        |       |
| Age at screening            | H6 | -0.05070 | 0.05070      | 2.04798 | 0.02476          | 0.00133        |       |
| Diagnosis of any cancer     | H6 | -0.20665 | 0.20665      |         | 0.10091          | 0.00543        |       |
| Positive FIT (1-sample)     | H6 | -0.53102 | 0.53102      |         | 0.25929          | 0.01395        |       |
| Chronic diarrhea            | H6 | -0.16010 | 0.16010      |         | 0.07818          | 0.00421        |       |
| Male                        | H6 | 0.57280  | 0.57280      |         | 0.27969          | 0.01505        |       |
| Mucus or bloody stool       | H6 | 0.18476  | 0.18476      |         | 0.09022          | 0.00485        |       |
| CRC in 1st degree relatives | H6 | -0.34194 | 0.34194      |         | 0.16697          | 0.00898        |       |
| Age at screening            | H7 | -0.13947 | 0.13947      | 3.44271 | 0.04051          | 0.00654        |       |
| Diagnosis of any cancer     | H7 | 0.56167  | 0.56167      |         | 0.16315          | 0.02634        |       |
| Positive FIT (1-sample)     | H7 | 1.71461  | 1.71461      |         | 0.49804          | 0.08041        |       |
| Chronic diarrhea            | H7 | 0.33761  | 0.33761      |         | 0.09807          | 0.01583        |       |

|                             |     |          |         |         |         |         |
|-----------------------------|-----|----------|---------|---------|---------|---------|
| Male                        | H7  | 0.24728  | 0.24728 |         | 0.07183 | 0.01160 |
| Mucus or bloody stool       | H7  | -0.06743 | 0.06743 |         | 0.01959 | 0.00316 |
| CRC in 1st degree relatives | H7  | 0.37464  | 0.37464 |         | 0.10882 | 0.01757 |
| Age at screening            | H8  | 0.16837  | 0.16837 | 1.20702 | 0.13949 | 0.00945 |
| Diagnosis of any cancer     | H8  | 0.22406  | 0.22406 |         | 0.18563 | 0.01258 |
| Positive FIT (1-sample)     | H8  | 0.09137  | 0.09137 |         | 0.07570 | 0.00513 |
| Chronic diarrhea            | H8  | -0.16035 | 0.16035 |         | 0.13285 | 0.00900 |
| Male                        | H8  | 0.14951  | 0.14951 |         | 0.12387 | 0.00839 |
| Mucus or bloody stool       | H8  | -0.21037 | 0.21037 |         | 0.17429 | 0.01181 |
| CRC in 1st degree relatives | H8  | -0.20300 | 0.20300 |         | 0.16818 | 0.01139 |
| Age at screening            | H9  | 0.57272  | 0.57272 | 4.14829 | 0.13806 | 0.02054 |
| Diagnosis of any cancer     | H9  | 0.07103  | 0.07103 |         | 0.01712 | 0.00255 |
| Positive FIT (1-sample)     | H9  | -0.68076 | 0.68076 |         | 0.16411 | 0.02442 |
| Chronic diarrhea            | H9  | -0.48120 | 0.48120 |         | 0.11600 | 0.01726 |
| Male                        | H9  | 0.17806  | 0.17806 |         | 0.04292 | 0.00639 |
| Mucus or bloody stool       | H9  | 0.91874  | 0.91874 |         | 0.22147 | 0.03295 |
| CRC in 1st degree relatives | H9  | 1.24579  | 1.24579 |         | 0.30031 | 0.04468 |
| Age at screening            | H10 | 0.02738  | 0.02738 | 0.58871 | 0.04651 | 0.00231 |
| Diagnosis of any cancer     | H10 | -0.17758 | 0.17758 |         | 0.30164 | 0.01501 |
| Positive FIT (1-sample)     | H10 | 0.03778  | 0.03778 |         | 0.06417 | 0.00319 |
| Chronic diarrhea            | H10 | 0.08230  | 0.08230 |         | 0.13980 | 0.00696 |
| Male                        | H10 | -0.04666 | 0.04666 |         | 0.07926 | 0.00394 |
| Mucus or bloody stool       | H10 | 0.20864  | 0.20864 |         | 0.35440 | 0.01764 |
| CRC in 1st degree relatives | H10 | -0.00837 | 0.00837 |         | 0.01422 | 0.00071 |
| Age at screening            | H11 | -0.29220 | 0.29220 | 3.56899 | 0.08187 | 0.00969 |
| Diagnosis of any cancer     | H11 | -0.54101 | 0.54101 |         | 0.15159 | 0.01794 |
| Positive FIT (1-sample)     | H11 | -1.46712 | 1.46712 |         | 0.41107 | 0.04865 |
| Chronic diarrhea            | H11 | -0.13045 | 0.13045 |         | 0.03655 | 0.00433 |
| Male                        | H11 | 0.08989  | 0.08989 |         | 0.02519 | 0.00298 |
| Mucus or bloody stool       | H11 | 0.50190  | 0.50190 |         | 0.14063 | 0.01664 |
| CRC in 1st degree relatives | H11 | -0.54642 | 0.54642 |         | 0.15310 | 0.01812 |
| H1                          | CRC | 0.25359  | 0.25359 | 7.79961 | 0.03251 |         |
| H10                         | CRC | 0.38816  | 0.38816 |         | 0.04977 |         |
| H11                         | CRC | -0.92309 | 0.92309 |         | 0.11835 |         |
| H2                          | CRC | -0.87356 | 0.87356 |         | 0.11200 |         |
| H3                          | CRC | -0.49969 | 0.49969 |         | 0.06407 |         |
| H4                          | CRC | 0.74603  | 0.74603 |         | 0.09565 |         |
| H5                          | CRC | 0.74781  | 0.74781 |         | 0.09588 |         |
| H6                          | CRC | -0.41957 | 0.41957 |         | 0.05379 |         |
| H7                          | CRC | 1.25921  | 1.25921 |         | 0.16144 |         |
| H8                          | CRC | -0.52840 | 0.52840 |         | 0.06775 |         |
| H9                          | CRC | 1.16050  | 1.16050 |         | 0.14879 |         |

FIT, faecal immunochemical test; CRC, colorectal cancer. Note:  $u_{jk}$  is calculated as the absolute value of weight between predictor variable  $k$  and hidden unit  $j$  divided by total absolute values of weights pointing to hidden unit  $j$ ;  $v_j$  is calculated as the absolute value of weight between hidden unit  $j$  and the outcome divided by total absolute values of weights pointing to the outcome;  $C_k$  represents the contribution of predictor variable  $k$  on the outcome; the sum of contributions of all predictor variables is 100%.

**Supplementary Table 4.** Weights from the input variables to the hidden layer neurons, and from the hidden layer neurons to the outcome variable in the artificial neural network model incorporating risk factors and 2-sample FIT results

| From                        | To | Weight   | Abs (weight) | Sum     | Abs (weight)/Sum | $v_j * u_{jk}$ | $C_k$ |
|-----------------------------|----|----------|--------------|---------|------------------|----------------|-------|
| Age at screening            | H1 | 0.06226  | 0.06226      | 2.58085 | 0.02412          | 0.00307        | 0.076 |
| Diagnosis of any cancer     | H1 | 0.29865  | 0.29865      |         | 0.11572          | 0.01471        | 0.118 |
| Positive FIT (2-sample)     | H1 | 0.76278  | 0.76278      |         | 0.29555          | 0.03756        | 0.394 |
| Chronic diarrhea            | H1 | 0.39843  | 0.39843      |         | 0.15438          | 0.01962        | 0.107 |
| Male                        | H1 | 0.06582  | 0.06582      |         | 0.02550          | 0.00324        | 0.073 |
| Mucus or bloody stool       | H1 | -0.51367 | 0.51367      |         | 0.19903          | 0.02530        | 0.097 |
| CRC in 1st degree relatives | H1 | 0.47924  | 0.47924      |         | 0.18569          | 0.02360        | 0.135 |
| Age at screening            | H2 | -0.00613 | 0.00613      | 2.00414 | 0.00306          | 0.00031        |       |
| Diagnosis of any cancer     | H2 | 0.34970  | 0.34970      |         | 0.17449          | 0.01791        |       |
| Positive FIT (2-sample)     | H2 | 0.94350  | 0.94350      |         | 0.47078          | 0.04832        |       |
| Chronic diarrhea            | H2 | 0.10637  | 0.10637      |         | 0.05308          | 0.00545        |       |
| Male                        | H2 | 0.24056  | 0.24056      |         | 0.12003          | 0.01232        |       |
| Mucus or bloody stool       | H2 | 0.21208  | 0.21208      |         | 0.10582          | 0.01086        |       |
| CRC in 1st degree relatives | H2 | -0.14581 | 0.14581      |         | 0.07275          | 0.00747        |       |
| Age at screening            | H3 | 0.32143  | 0.32143      | 3.74331 | 0.08587          | 0.01500        |       |
| Diagnosis of any cancer     | H3 | 0.62224  | 0.62224      |         | 0.16623          | 0.02905        |       |
| Positive FIT (2-sample)     | H3 | 1.43561  | 1.43561      |         | 0.38351          | 0.06702        |       |
| Chronic diarrhea            | H3 | 0.15308  | 0.15308      |         | 0.04089          | 0.00715        |       |
| Male                        | H3 | 0.04457  | 0.04457      |         | 0.01191          | 0.00208        |       |
| Mucus or bloody stool       | H3 | -0.43135 | 0.43135      |         | 0.11523          | 0.02014        |       |
| CRC in 1st degree relatives | H3 | 0.73503  | 0.73503      |         | 0.19636          | 0.03431        |       |
| Age at screening            | H4 | -0.51833 | 0.51833      | 2.51825 | 0.20583          | 0.02999        |       |
| Diagnosis of any cancer     | H4 | 0.14509  | 0.14509      |         | 0.05761          | 0.00839        |       |
| Positive FIT (2-sample)     | H4 | 0.51639  | 0.51639      |         | 0.20506          | 0.02988        |       |
| Chronic diarrhea            | H4 | 0.25205  | 0.25205      |         | 0.10009          | 0.01458        |       |
| Male                        | H4 | -0.23620 | 0.23620      |         | 0.09380          | 0.01367        |       |
| Mucus or bloody stool       | H4 | -0.31348 | 0.31348      |         | 0.12448          | 0.01814        |       |
| CRC in 1st degree relatives | H4 | -0.53671 | 0.53671      |         | 0.21313          | 0.03106        |       |
| Age at screening            | H5 | 0.01739  | 0.01739      | 1.94922 | 0.00892          | 0.00108        |       |
| Diagnosis of any cancer     | H5 | -0.22914 | 0.22914      |         | 0.11755          | 0.01423        |       |
| Positive FIT (2-sample)     | H5 | -0.93668 | 0.93668      |         | 0.48054          | 0.05818        |       |
| Chronic diarrhea            | H5 | -0.21051 | 0.21051      |         | 0.10800          | 0.01308        |       |
| Male                        | H5 | 0.15961  | 0.15961      |         | 0.08189          | 0.00991        |       |
| Mucus or bloody stool       | H5 | 0.16404  | 0.16404      |         | 0.08416          | 0.01019        |       |
| CRC in 1st degree relatives | H5 | -0.23185 | 0.23185      |         | 0.11894          | 0.01440        |       |
| Age at screening            | H6 | -0.10081 | 0.10081      | 0.51943 | 0.19408          | 0.00358        |       |
| Diagnosis of any cancer     | H6 | 0.04294  | 0.04294      |         | 0.08267          | 0.00153        |       |
| Positive FIT (2-sample)     | H6 | -0.20618 | 0.20618      |         | 0.39692          | 0.00733        |       |
| Chronic diarrhea            | H6 | 0.07475  | 0.07475      |         | 0.14390          | 0.00266        |       |
| Male                        | H6 | 0.02520  | 0.02520      |         | 0.04851          | 0.00090        |       |
| Mucus or bloody stool       | H6 | -0.05579 | 0.05579      |         | 0.10741          | 0.00198        |       |
| CRC in 1st degree relatives | H6 | -0.01376 | 0.01376      |         | 0.02650          | 0.00049        |       |
| Age at screening            | H7 | -0.17502 | 0.17502      | 1.62899 | 0.10744          | 0.00414        |       |
| Diagnosis of any cancer     | H7 | 0.11573  | 0.11573      |         | 0.07104          | 0.00274        |       |
| Positive FIT (2-sample)     | H7 | -0.96751 | 0.96751      |         | 0.59393          | 0.02290        |       |
| Chronic diarrhea            | H7 | 0.02135  | 0.02135      |         | 0.01311          | 0.00051        |       |

|                             |     |          |         |          |         |         |
|-----------------------------|-----|----------|---------|----------|---------|---------|
| Male                        | H7  | 0.09152  | 0.09152 |          | 0.05618 | 0.00217 |
| Mucus or bloody stool       | H7  | -0.15310 | 0.15310 |          | 0.09399 | 0.00362 |
| CRC in 1st degree relatives | H7  | -0.10476 | 0.10476 |          | 0.06431 | 0.00248 |
| Age at screening            | H8  | 0.01362  | 0.01362 | 1.34920  | 0.01009 | 0.00122 |
| Diagnosis of any cancer     | H8  | -0.15141 | 0.15141 |          | 0.11222 | 0.01358 |
| Positive FIT (2-sample)     | H8  | -0.71084 | 0.71084 |          | 0.52686 | 0.06377 |
| Chronic diarrhea            | H8  | -0.36175 | 0.36175 |          | 0.26812 | 0.03245 |
| Male                        | H8  | -0.04465 | 0.04465 |          | 0.03309 | 0.00401 |
| Mucus or bloody stool       | H8  | -0.00392 | 0.00392 |          | 0.00290 | 0.00035 |
| CRC in 1st degree relatives | H8  | -0.06302 | 0.06302 |          | 0.04671 | 0.00565 |
| Age at screening            | H9  | -0.00319 | 0.00319 | 0.85474  | 0.00373 | 0.00032 |
| Diagnosis of any cancer     | H9  | 0.13787  | 0.13787 |          | 0.16130 | 0.01390 |
| Positive FIT (2-sample)     | H9  | 0.34785  | 0.34785 |          | 0.40697 | 0.03507 |
| Chronic diarrhea            | H9  | -0.05757 | 0.05757 |          | 0.06735 | 0.00580 |
| Male                        | H9  | -0.14917 | 0.14917 |          | 0.17452 | 0.01504 |
| Mucus or bloody stool       | H9  | -0.02298 | 0.02298 |          | 0.02688 | 0.00232 |
| CRC in 1st degree relatives | H9  | 0.13611  | 0.13611 |          | 0.15924 | 0.01372 |
| Age at screening            | H10 | 0.14494  | 0.14494 | 0.49191  | 0.29464 | 0.00576 |
| Diagnosis of any cancer     | H10 | -0.01503 | 0.01503 |          | 0.03055 | 0.00060 |
| Positive FIT (2-sample)     | H10 | 0.13106  | 0.13106 |          | 0.26643 | 0.00521 |
| Chronic diarrhea            | H10 | -0.08442 | 0.08442 |          | 0.17161 | 0.00335 |
| Male                        | H10 | 0.06217  | 0.06217 |          | 0.12638 | 0.00247 |
| Mucus or bloody stool       | H10 | 0.03420  | 0.03420 |          | 0.06953 | 0.00136 |
| CRC in 1st degree relatives | H10 | 0.02010  | 0.02010 |          | 0.04086 | 0.00080 |
| Age at screening            | H11 | 0.49770  | 0.49770 | 1.85152  | 0.26881 | 0.01209 |
| Diagnosis of any cancer     | H11 | 0.06258  | 0.06258 |          | 0.03380 | 0.00152 |
| Positive FIT (2-sample)     | H11 | 0.76513  | 0.76513 |          | 0.41325 | 0.01858 |
| Chronic diarrhea            | H11 | 0.08364  | 0.08364 |          | 0.04518 | 0.00203 |
| Male                        | H11 | 0.30338  | 0.30338 |          | 0.16386 | 0.00737 |
| Mucus or bloody stool       | H11 | 0.10202  | 0.10202 |          | 0.05510 | 0.00248 |
| CRC in 1st degree relatives | H11 | 0.03706  | 0.03706 |          | 0.02002 | 0.00090 |
| H1                          | CRC | -1.70992 | 1.70992 | 13.45352 | 0.12710 |         |
| H10                         | CRC | -0.26284 | 0.26284 |          | 0.01954 |         |
| H11                         | CRC | -0.60485 | 0.60485 |          | 0.04496 |         |
| H2                          | CRC | 1.38097  | 1.38097 |          | 0.10265 |         |
| H3                          | CRC | 2.35089  | 2.35089 |          | 0.17474 |         |
| H4                          | CRC | -1.96034 | 1.96034 |          | 0.14571 |         |
| H5                          | CRC | -1.62896 | 1.62896 |          | 0.12108 |         |
| H6                          | CRC | 0.24840  | 0.24840 |          | 0.01846 |         |
| H7                          | CRC | -0.51868 | 0.51868 |          | 0.03855 |         |
| H8                          | CRC | -1.62831 | 1.62831 |          | 0.12103 |         |
| H9                          | CRC | -1.15937 | 1.15937 |          | 0.08618 |         |

FIT, faecal immunochemical test; CRC, colorectal cancer. Note:  $u_{jk}$  is calculated as the absolute value of weight between predictor variable  $k$  and hidden unit  $j$  divided by total absolute values of weights pointing to hidden unit  $j$ ;  $v_j$  is calculated as the absolute value of weight between hidden unit  $j$  and the outcome divided by total absolute values of weights pointing to the outcome;  $C_k$  represents the contribution of predictor variable  $k$  on the outcome; the sum of contributions of all predictor variables is 100%.

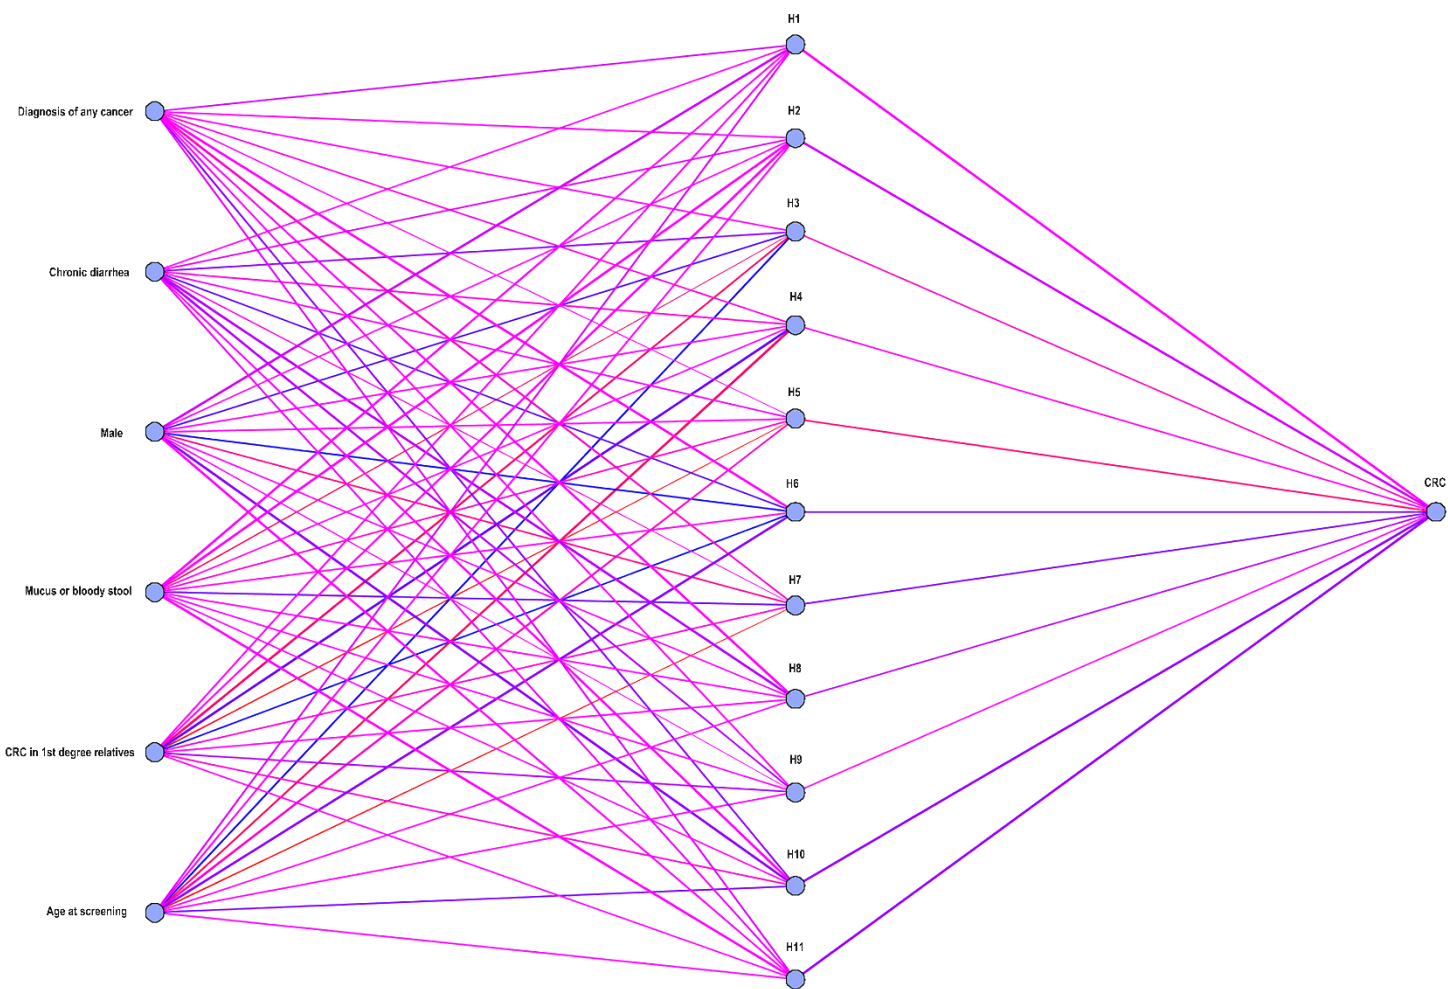

**Supplementary Figure 1.** Artificial neural network architecture for predicting current risk of CRC using risk factors only.

CRC, colorectal cancer. Note: blue, red and purple connecting lines indicated negative weights, positive weights and small weights, respectively.



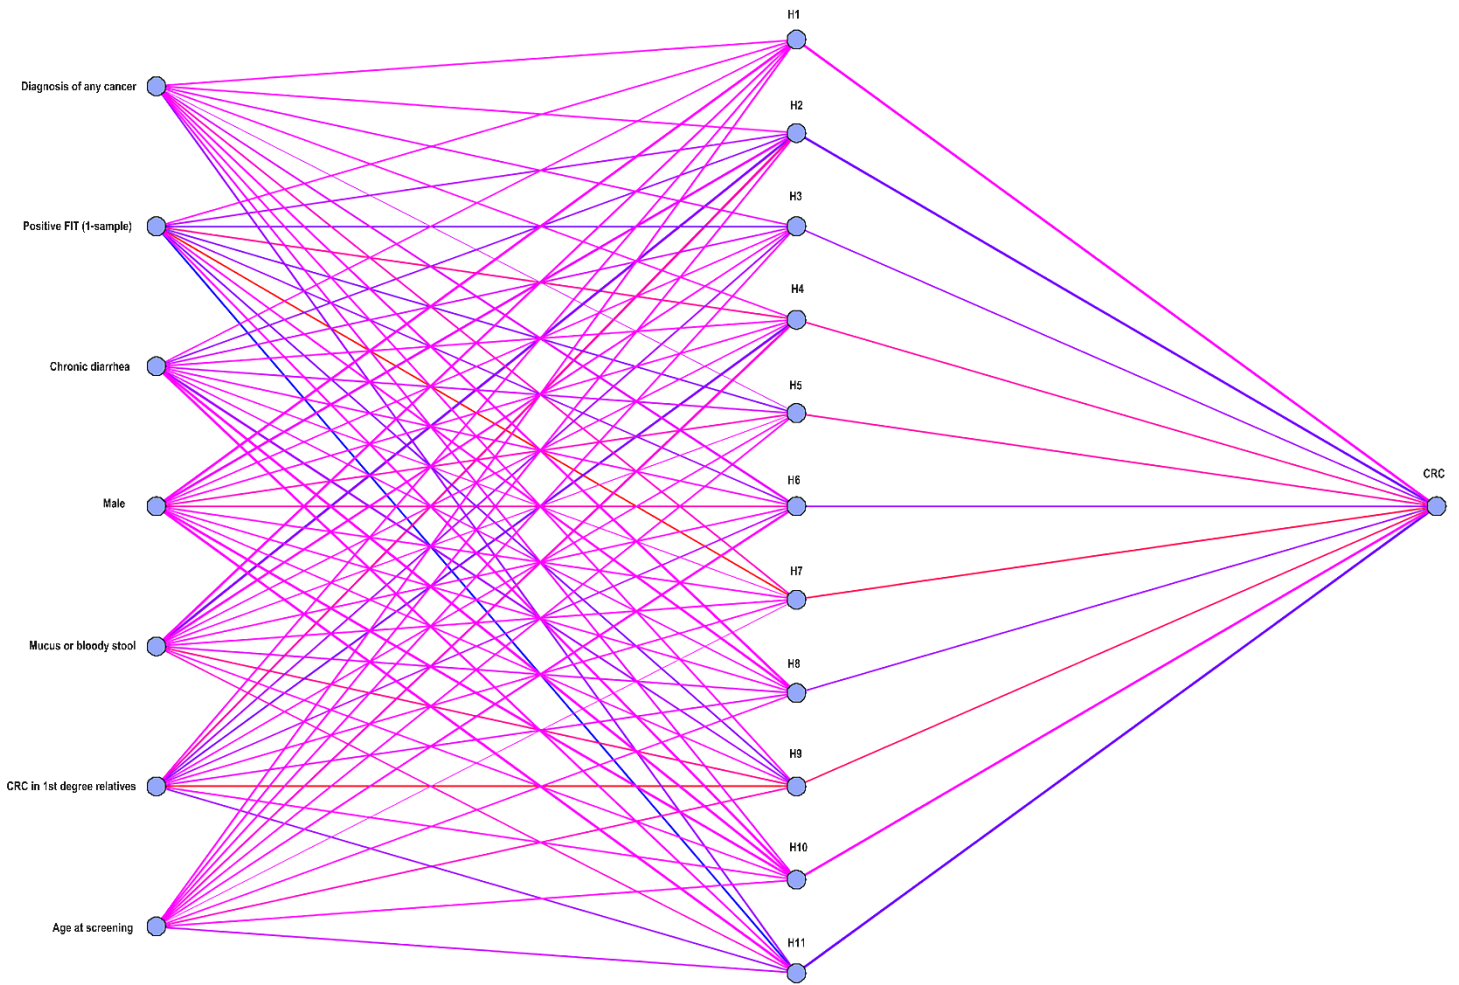

**Supplementary Figure 2.** Artificial neural network architecture for predicting current risk of CRC using risk factors and 1-sample FIT results.

CRC, colorectal cancer; FIT, faecal immunochemical test. Note: blue, red and purple connecting lines indicated negative weights, positive weights and small weights, respectively.

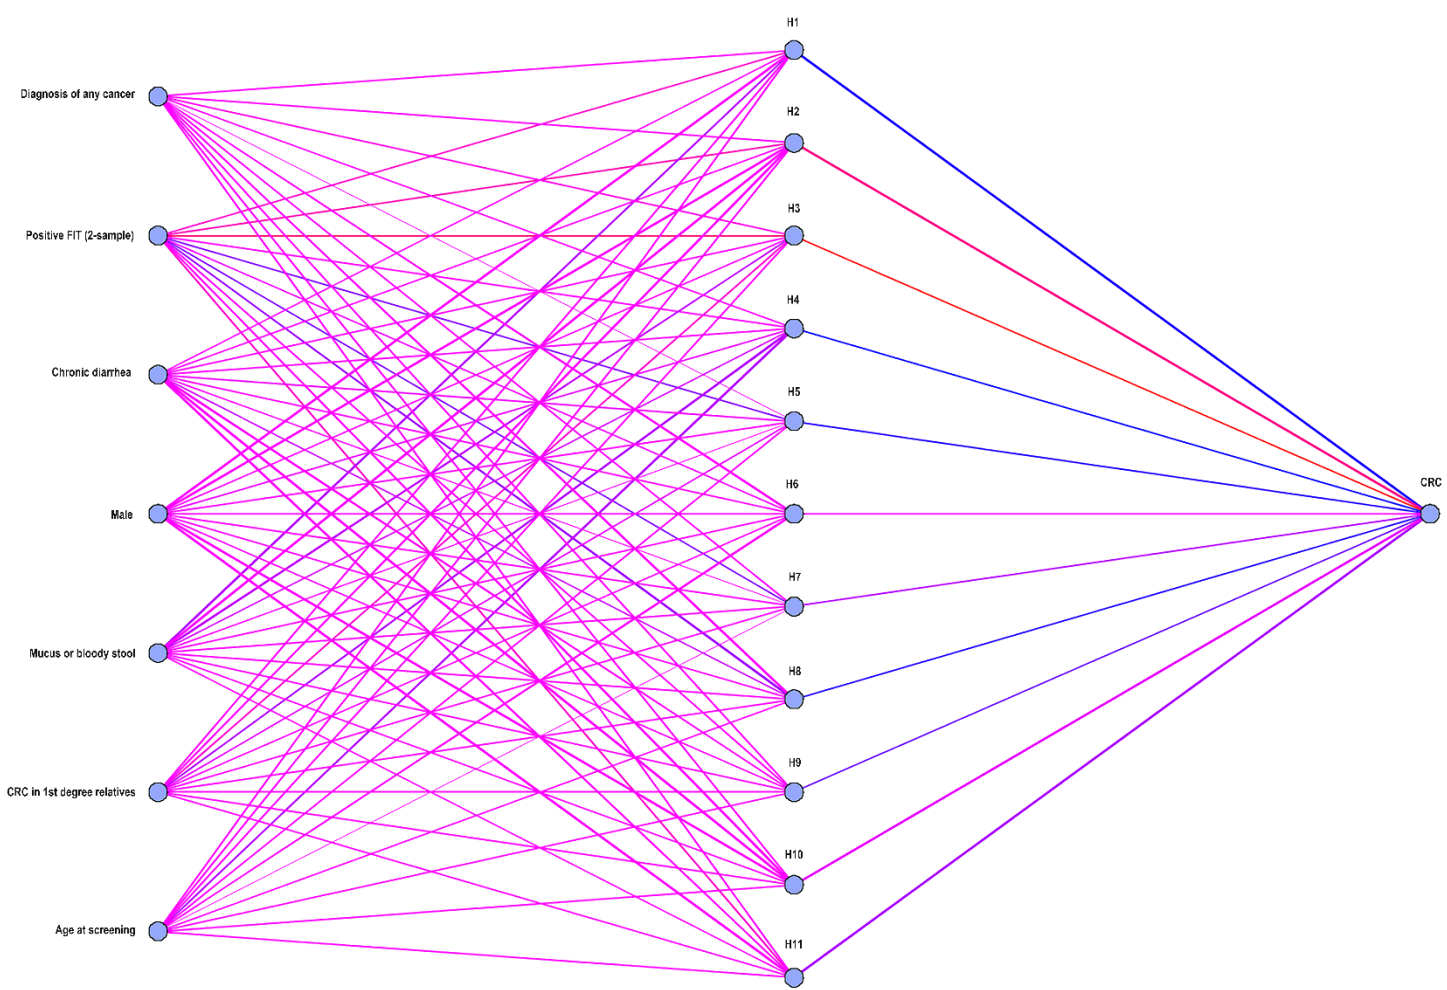

**Supplementary Figure 3.** Artificial neural network architecture for predicting current risk of CRC using risk factors and 2-sample FIT results.

CRC, colorectal cancer; FIT, faecal immunochemical test. Note: blue, red and purple connecting lines indicated negative weights, positive weights and small weights, respectively.

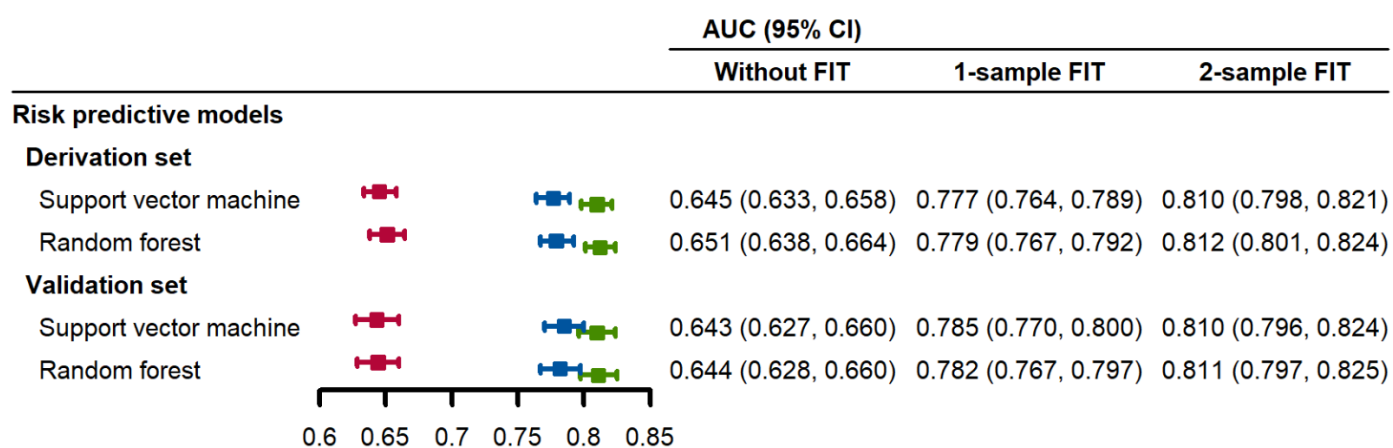

**Supplementary Figure 4.** Area under the receiver operating characteristic curve (AUC) of SVM and RF models for colorectal cancer in the derivation and validation sets.

CI, confidence interval; SVM, support vector machine; RF, random forest.

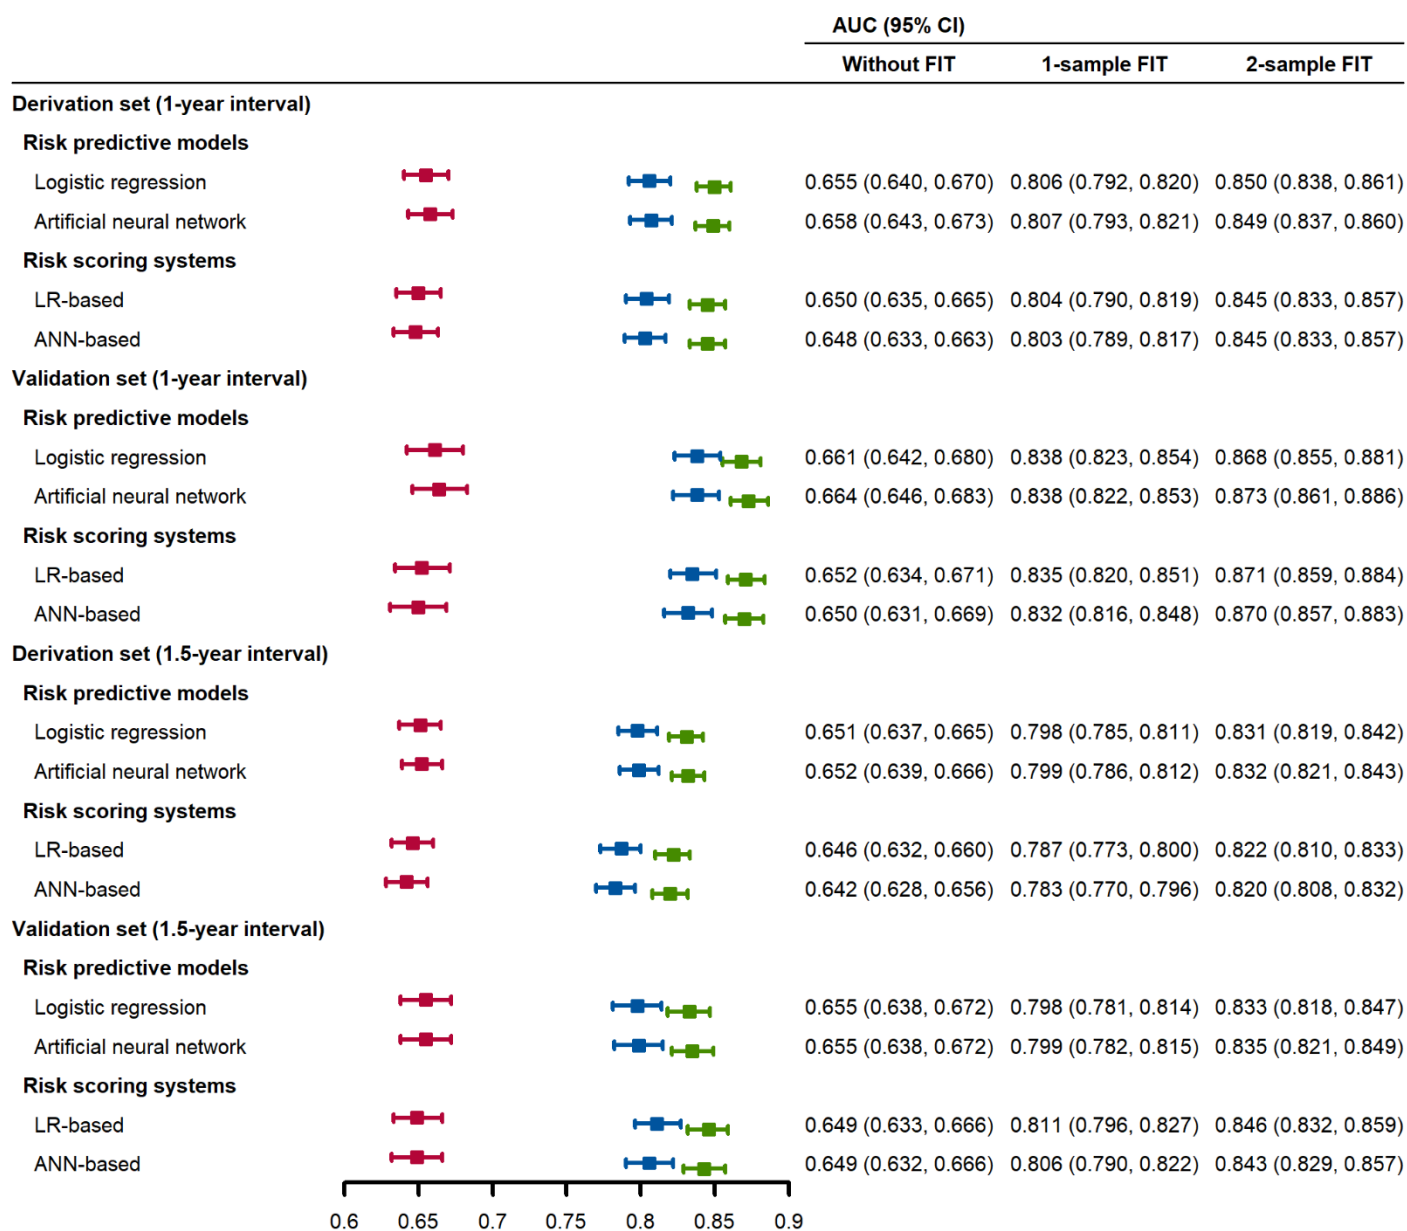

**Supplementary Figure 5.** Sensitivity analysis for area under the receiver operating characteristic curve (AUC) of predictive models and scoring systems for colorectal cancer in the derivation and validation sets.

CI, confidence interval; LR, logistic regression; ANN, artificial neural network.
